# Supplementary material
Source: publisher figshare collection journal article supplement (https://frontiersin.figshare.com/ndownloader/files/34305848)

**Supplementary figure 1. Flow diagram of analytical sample.**

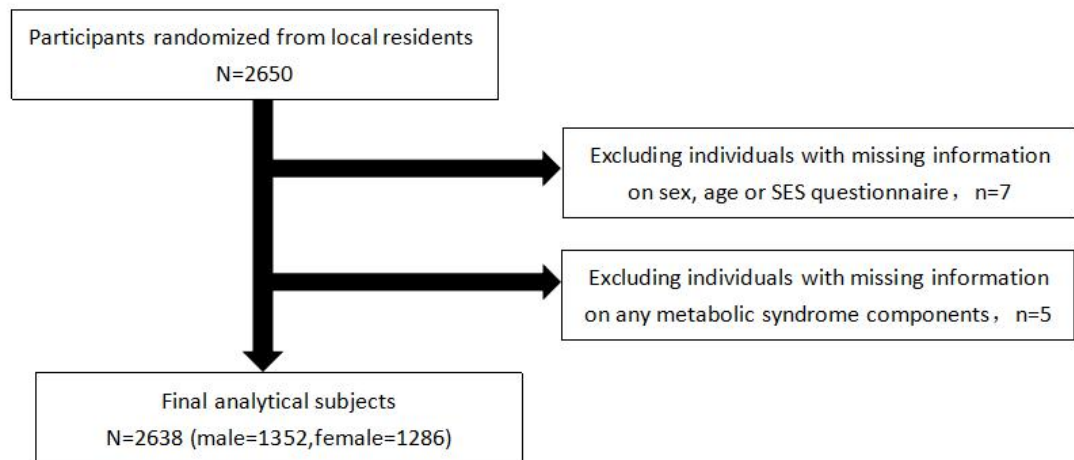

Supplement: Supplementary file [file 34305848]
